# Supplementary material for: Biogenic silica cycling in the Skagerrak
Source: Frontiers journal article supplement (doi:10.3389/fmars.2023.1141448), 2023-03-23
Supplement: Table_1.XLSX [file Table_1.XLSX]

## Sheet: MUC1
					Solid phase data					Pore water data
	Station	Sed. depth	Porosity	Grain-size D50	BSi	TOC	CaCO3	210Pb	Sed. depth	H4SiO4	Fe	Li	K
		cm		µm	wt%	wt%	wt%	dpm/g	cm	µmol/l	µmol/l	µmol/l	mmol/l
	MUC1	0.5	0.857224	17.3238	3.19203	1.7035	11.6833		0	7.485	0.832083	24.9066	10.1503
		1.5	0.829348	16.0854		1.7805	12.0333	3.9	0.5	136	1.00792	25.5009	10.5946
		2.5	0.798774	18.038	3.35724	1.771	11.9166		1.5	177.3	1.63192	25.1065	10.7288
		3.5	0.794563	18.5897		1.748	12.8499	4.08	2.5	169.25	2.68671	25.0461	10.7148
		4.5	0.795391	19.3211	3.8395	1.7495	12.3291		3.5	197.8	54.6905	25.2937	10.9083
		5.5	0.775624	20.0654		1.7045	11.5375		4.5	244.25
		6.5	0.791183	20.8368	3.63531	1.808	13.2041	5.22	5.5	275.4	223.23	25.195	11.0419
		7.5	0.731827	19.2843		1.821	12.3208		7	299.8	242.293	25.1208	11.1447
		8.5	0.754309	18.5887	4.11034	1.7465	12.5416		9	316.95	185.666	25.1006	11.1304
		9.5	0.763622	19.2007		1.7905	12.3	4.32	11	321.1	138.808	25.2664	11.1132
		10.5	0.773059	18.9564	4.21061	1.7265	12.5791		13	350.2	97.8204	25.5229	11.3794
		11.5	0.767398	18.9588		1.7415	12.4625		16	393.3	97.6128	25.3156	11.2319
		12.5	0.762493	18.8988	2.13167	1.7495	12.1291		20	437.95	181.79	26.1069	11.3028
		13.5	0.760419	18.7319		1.7195	12.5583	3.96	24	518	124.59	25.1665	11.1782
		14.5	0.752968	15.3053	2.51278	1.728	12.4958		28	579	101.132	25.2645	11.1336
		15.5	0.748544	18.0041		1.7305	12.5708		32	611
		16.5	0.748343	18.0452	2.3383	1.7115	12.3083		36	606.5	121.098	25.1141	11.0254
		17.5	0.728477	16.2379		1.707	12.6083		40	638.5	82.464	25.4786	11.2179
		18.5	0.746072	17.0953	2.62131	1.683	12.7458	3.24	44	661.5	110.823	25.4633	11.3558
		19.5	0.750089	16.721		1.733	13.4291
		20.5	0.753375	16.721	2.85386	1.7035	12.8999
		21.5	0.751825	18.3265		1.731	12.9666
		22.5	0.750907	20.5455	3.19888	1.723	12.9041
		23.5	0.751281	17.3117		1.706	12.7374	3.06
		24.5	0.827469	17.4829	2.62462	1.71	12.8333
		25.5	0.734575	16.2379		1.715	12.9249
		26.5	0.613625	14.8561	4.26949	1.723	12.7583
		27.5	0.787013	16.3705		1.699	12.6333
		28.5	0.798028	15.808	2.87761	1.7225	12.5333	2.82
		29.5	0.706314	14.3459		1.703	12.1791
		30.5	0.789144	18.8324	3.26016	1.714	12.2666
		31.5	0.674046	18.5883		1.711	11.875
		32.5	0.800514	18.1789	3.02617	1.7175	12.5458
		33.5	0.686098	16.6866		1.731	12.3875	2.58
		34.5	0.741512	17.7575	3.00132	1.7055	11.875
		35.5	0.793886	16.9417		1.738	11.1291
		36.5	0.662507	15.8713	4.36437	1.7725	11.2
		37.5	0.804717	17.8208		1.774	11.35
		38.5	0.656397	16.216	3.93832	1.735	11.6208
		39.5	0.736618	16.7095		1.778	11.2	2.28
		40.5	0.780598	18.0659	2.58785	1.7135	11.4375
		41.5	0.7047	17.4706		1.7275	10.7083
		42.5	0.777453	19.3705	2.61892	1.754	10.6125
		43.5	0.727619	17.4706		1.7715	9.94996
		44.5	0.768588	19.9867	3.48514	1.772	10.7375
		45.5	0.713775	18.8718		1.651	10.0833
		46.5	0.695649	18.2858	3.16267	1.723	11
		47.5	0.788338	18.7484		1.702	11.2208
		48.5	0.679709	18.4255	3.45046	1.749	9.65413

## Sheet: MUC2
					Solid phase data					Pore water data
	Station	Sed. depth	Porosity	Grain-size D50	BSi	TOC	CaCO3	210Pb	Sed. depth	H4SiO4	Fe	Li	K
		cm		µm	wt%	wt%	wt%	dpm/g	cm	µmol/l	µmol/l	µmol/l	mmol/l
	MUC2	0.5	0.868824	12.5247	2.83	2.624	11.6666		0	10.5	0.110845	24.7569	10.1464
		1.5	0.86882	11.8521	3.21128	2.6555	13.0416		0.5	101.06	0.483434	26.5885	10.6887
		2.5	0.851864	10.5776	2.45111	2.6225	12.0541		1.5	149.98	1.77117	26.6792	10.7745
		3.5	0.817543	8.97932	3.58611	2.597	10.9166		2.5	154.32	0.433046	25.9758	10.8092
		4.5	0.810407	8.40617	2.95876	2.621	12.4666		3.5	154	0.627819	25.7654	10.8382
		5.5	0.799776	10.0961	2.68958	2.557	13.4458		4.5	150.9
		6.5	0.799905	10.2195	2.90355	2.606	13.2166		5.5	146.28	0.684345	25.6249	11.0208
		7.5	0.797021	8.81067	3.51421	2.551	14.4583		7	146.98	36.8871	25.6011	11.2305
		8.5	0.797457	9.13627	2.33982	2.6075	13.3124		9	138.14	60.5181	25.6214	11.4102
		9.5	0.796602	9.40534	2.71703	2.5825	14.2791		11	156.92	56.3159	25.7305	11.5029
		10.5	0.793626	10.8988	1.74112	2.657	14.3583		13	218.8	72.3183	25.4113	11.5492
		11.5	0.796131	10.8241	2.59993	2.632	13.6333		16	287.2	67.4943	25.4543	11.5281
		12.5	0.796577	3.05367	2.48813	2.665	13.5708		20	349.8	52.6609	25.1941	11.7584
		13.5	0.789853	9.16648	1.46797	2.625	15.9791		24	405	42.1635	25.4514	11.7804
		14.5	0.782988	9.41891	2.30387	2.6975	14.1874		28	424.2	10.8055	25.356	12.1001
		15.5	0.781718	8.88404	1.42125	2.6635	12.35		32	451.8	17.3571	25.0378	11.8574
		16.5	0.776322	7.4252	2.7959	2.7015	12.4416		36	488.4	14.0032	24.9433	11.8524
		17.5	0.7743	9.04662	1.73819	2.6875	13.1041
		18.5	0.772443	10.0354	2.82166	2.622	12.6999
		19.5	0.768269	9.42798	2.44661	2.609	12.0125
		20.5	0.772228	9.8518	2.36089	2.5585	12.5499
		21.5	0.76821	10.2979	2.04889	2.5215	12.6541
		22.5	0.766292	8.91699	2.55625	2.4745	12.8958
		23.5	0.764047	8.88404	2.42286	2.526	12.3291
		24.5	0.764098	8.87174	3.61288	2.525	14.0749
		25.5	0.764838	8.69459	2.13295	2.6075	12.9749
		26.5	0.763568	7.92309	2.21953	2.5655	13.8833
		27.5	0.763198	8.5811	1.66528	2.4255	14.8624
		28.5	0.764076	8.7184	3.01857	2.522	13.2124
		29.5	0.755639	8.35044	1.93114	2.437	13.3541
		30.5	0.761862	8.48147	2.46089	2.416	13.6833
		31.5	0.761418	9.72613	1.77734	2.4235	13.7624
		32.5	0.761983	7.88611	3.62165	2.444	13.6666
		33.5	0.764336	8.99188	2.15654	2.4285	14.1999
		34.5	0.766495	9.41891	2.50484	2.4225	13.7541
		35.5	0.769113	9.25814	1.74115	2.2565	14.4208
		36.5	0.768335	8.9294	2.56693	2.3635	14.5124
		37.5	0.772373	8.42114	2.40319	2.277	13.0124
		38.5	0.771293	8.7463	2.03014	2.404	13.9291
		39.5	0.772298	9.01287	1.76694	2.338	13.9791
		40.5	0.767693	10.2612	3.29153	2.443	14.0416

## Sheet: MUC3
					Solid phase data					Pore water data
	Station	Sed. depth	Porosity	Grain-size D50	BSi	TOC	CaCO3	210Pb	Sed. depth	H4SiO4	Fe	Li	K
		cm		µm	wt%	wt%	wt%	dpm/g	cm	µmol/l	µmol/l	µmol/l	mmol/l
	MUC3	0.5	0.836114	13.736	1.48149	1.709	11.2416		0	7.126	0.233021	25.2113	10.3371
		1.5	0.84851	13.1666		1.971	13.3624	8.94	0.5	129.42	0.437204	25.8038	10.6801
		2.5	0.83137	11.9724	2.63859	1.963	13.2083		1.5	173.38	0.499819	25.627	10.6155
		3.5	0.830457	10.2769		1.954	13.2333	7.92	2.5	186.54	1.25904	25.4946	10.6891
		4.5	0.829332	11.2853	2.76844	1.95	13.5208		3.5	190.86	17.3122	25.4723	10.7257
		5.5	0.822357	9.40082		1.935	13.6916		4.5	211.2	65.9482	25.4815	10.781
		6.5	0.82503	11.9254	2.52347	2.0505	13.3083	8.76	5.5	233.8	106.828	25.3371	10.6946
		7.5	0.813771	9.67377		1.942	13.4708		7	234.2	116.365	25.5356	10.8251
		8.5	0.800186	11.1101	2.84182	1.887	13.6541		9	288.8	173.763	25.3683	10.7415
		9.5	0.792452	11.4087		1.8085	14.4708	4.68	11	362.2	189.301	25.3394	10.8188
		10.5	0.770651	11.0744	2.40849	1.8425	14.1249		13	440.6	159.807	25.393	10.744
		11.5	0.776829	11.3839		1.877	15.1499		16	501.2	138.925	25.3851	10.6847
		12.5	0.783767	7.45243	2.37033	1.9655	15.0416		20	571.6	114.316	25.2775	10.6407
		13.5	0.781972	11.152		1.975	14.9374	6	24	591
		14.5	0.746414	11.6495	2.05776	1.8545	12.3583		28	659.8	112.122	25.3548	10.5671
		15.5	0.764377	12.3526		1.973	14.3083		32	633.2	82.0258	25.3551	10.616
		16.5	0.777622	13.4872	1.8167	2.048	14.5666		36	615.6
		17.5	0.777624	14.1144		2.0435	14.7499		39.5	598
		18.5	0.767385	12.503	2.36231	2.0115	13.3374	4.74
		19.5	0.769291	12.1153		2.073	13.2833
		20.5	0.758243	10.7334	1.87522	2.0475	14.9583
		21.5	0.758646	10.3454		2.069	15.2583
		22.5	0.75448	9.04662	2.55965	2.0295	15.6083
		23.5	0.751239	9.50567		2.0105	15.9999	6.24
		24.5	0.754401	10.0505	3.0298	2.004	15.8541
		25.5	0.752025	11.4025		1.965	15.8249
		26.5	0.757713	9.68325	3.09216	2.025	15.5208
		27.5	0.764353	10.4685		1.9915	15.8416
		28.5	0.765179	11.819	3.0298	1.996	14.9458	4.5
		29.5	0.76162	10.4685		1.982	15.9874
		30.5	0.752027	10.356	2.82458	1.9105	14.4499
		31.5	0.757154	10.7729		2.017	14.9416
		32.5	0.765722	11.0626	3.42499	2.017	14.9874
		33.5	0.768008	12.0265		2.1065	14.7499	7.56
		34.5	0.769866	9.95529	2.91783	2.159	14.4624
		35.5	0.773351	12.0401		2.17
		36.5	0.764715	12.2191	2.42226	2.086	14.5624
		37.5	0.751621	9.34241		2.0175	15.0541
		38.5	0.734813	11.6818	2.6	2.0665	14.1708
		39.5	0.726704	11.2547		2.038	14.3166	4.98
		40.5	0.709063	11.0567	2.1	1.9925	13.6083

## Sheet: MUC5
					Solid phase data					Pore water data
	Station	Sed. depth	Porosity	Grain-size D50	BSi	TOC	CaCO3	210Pb	Sed. depth	H4SiO4	Fe	Li	K
		cm		µm	wt%	wt%	wt%	dpm/g	cm	µmol/l	µmol/l	µmol/l	mmol/l
	MUC5	0.5	0.875293	14.364	2.63501	2.133	12.8124		0	15.056	0.231908	25.7742	10.2697
		1.5	0.846336	8.79047		2.117	13.4333	10.6154	0.5	105.86	0.315388	27.7462	10.7058
		2.5	0.83701	8.65124	1.98033	2.0685	14.3666		1.5	167.44	1.63087	28.0286	10.823
		3.5	0.818291	20.59		2.1345	14.0124	12.315	2.5	182.36	2.12763	27.1712	10.7235
		4.5	0.819642	7.28574	2.06986	1.989	15.9458	10.5948	3.5	181.76	0.382608	26.723	10.8101
		5.5	0.811181	7.65759		2.0055	15.2374	11.5452	4.5	170.64	1.99629	26.5969	10.8544
		6.5	0.811487	7.86607	2.37845	1.945	15.7333	10.9971	5.5	149.02	0.373983	26.4809	10.8826
		7.5	0.806937	8.50048		2.037	14.9749	9.59004	7	135.3	33.5798	26.4404	10.9846
		8.5	0.798984	8.50048	2.67357	1.9025	15.8583		9	151.02	78.9759	26.419	10.9942
		9.5	0.794433	8.36153		2.064	14.1791	8.08327	11	171.84	97.9811	26.4384	11.0161
		10.5	0.790664	8.57723	2.23973	2.039	13.5208	8.18872	13	196.58	109.184	26.1419	10.9583
		11.5	0.784053	8.76232		1.9575	14.7666	6.60304	16	241.4	135.014	26.0826	10.9521
		12.5	0.78141	7.72817	2.57649	2.09	13.6708	6.75076	20	313.8	90.7298	26.3206	11.0865
		13.5	0.779588	8.71442		2.197	13.2333	6.79877	24	382.4	68.1234	26.6379	11.1993
		14.5	0.776037	8.59272	2.52407	2.2235	12.7124		28	413.6	35.6498	26.3202	11.1555
		15.5	0.773177	9.44616		2.2245	13.9458	5.05638	32	461.2	31.9321	26.3066	11.0092
		16.5	0.772312	8.82283	2.14304	2.1795	14.1083		36	419.2	101.531	27.1845	11.4862
		17.5	0.772442	8.91286		2.1855	13.2749		40	461.2
		18.5	0.771254	8.89637	2.29272	2.169	13.7083
		19.5	0.770421	8.93354		2.1915	13.7041
		20.5	0.769642	8.2662	3	2.2395	14.0291
		21.5	0.764187	9.0255		2.265	14.1749
		22.5	0.759932	8.5387	1.8	2.2835	16.1458
		23.5	0.758006	7.75411		2.216	13.9333	2.93352
		24.5	0.754785	8.92112	1.8	2.2075	13.3333
		25.5	0.750206	8.13371		2.183	13.3791
		26.5	0.73774	8.18698	2.6	2.1405	12.9166
		27.5	0.747618	7.49208		2.1555	12.6916
		28.5	0.747404	7.41917	2.9	2.159	13.3291	1.76541
		29.5	0.753111	8.02894		2.1215	13.3916
		30.5	0.73589	8.15495	4	2.066	12.8124
		31.5	0.747613	8.36153		2.0165	12.8333
		32.5	0.72979	8.68274	2.4	1.988	13.7791
		33.5	0.752424	9.97022		2.0135	12.6083
		34.5	0.748045	8.87174	2.2	2.01	13.3874
		35.5	0.74554	8.65517		2.015	13.4041
		36.5	0.742782	8.30997	3.7	1.9775	13.5499
		37.5	0.74564	22.7227		1.938	14.0833
		38.5	0.750091	8.77436	2.4	1.9555	13.3833
		39.5	0.754118	9.04662		1.9755	13.1624
		40.5	0.750845	35.3861	2.7	1.902	13.4583	0.345001
		41.5	0.745866	23.25		1.9405	12.9333
		42.5	0.737251	9.3648	2.566	1.8825	13.2499
		43.5	0.734475	9.53334		1.873	13.3041
		44.5	0.730148	9.30233	3.69686	1.8315	13.5666

## Sheet: MUC6
					Solid phase data					Pore water data
	Station	Sed. depth	Porosity	Grain-size D50	BSi	TOC	CaCO3	210Pb	Sed. depth	H4SiO4	Fe	Li	K
		cm		µm	wt%	wt%	wt%	dpm/g	cm	µmol/l	µmol/l	µmol/l	mmol/l
	MUC6	0.5	0.503266		0.631972	0.451	4.58748		0	0	1.47377	26.2678	10.4565
		1.5	0.49643	105.727		0.46	5.49581		0.5	17.8	0.694399	26.4758	10.7078
		2.5	0.484526	109.068	0.497262	0.497	5.46248		1.5	35.6	7.59115	26.3137	10.7877
		3.5	0.483953	106.396		0.5155	6.40581		2.5	71.21	93.641	26.4567	10.9173
		4.5	0.49238	123.026	0.858921	0.568	5.94581		4	142.4	69.4877	26.3529	10.8606
		5.5	0.494902	104.149		0.554	6.53331		6	213.6	48.4592	26.3688	10.9481
		6.5	0.503415	97.8099	0.71115	0.596	5.85831		9	356	4.52986	26.3954	10.9621
		7.5	0.504022	93.169		0.63	5.67914		13	379.55	6.89564	26.0186	10.8869
		8.5	0.493202	113.688	0.598642	0.6355	6.53747		17	456.15	0.67362	26.0493	10.9706
		9.5	0.473835	93.2748		0.632	6.38747		21	500.5	0.538841	25.7867	10.8718
		10.5	0.48718	92.6828	0.448913	0.609	6.16248		24.5	521.5
		11.5	0.4901	112.88		0.6365	6.52497
		12.5	0.49807	94.481	0.554355	0.768	5.91664
		13.5	0.50984	94.2024		0.659	7.0833
		14.5	0.50928	88.6961	0.493805	0.6455	6.75414
		15.5	0.517033	91.6385		0.636	6.58747
		16.5	0.514181	111.49		0.6035	6.68747
		17.5	0.516336	93.8193		0.599	6.12498
		18.5	0.491612	91.3095	0.545998	0.5315	6.74581
		19.5	0.476083	90.0896		0.563	6.31664
		20.5	0.489718	84.6204		0.5815	6.68747
		21.5	0.494703	93.55		0.594	6.59997
		22.5	0.508281	83.3152	0.404022	0.534	6.79164
		23.5	0.523261	93.0224		0.628	6.72081
		24.5	0.526324	89.5746		0.66	5.97914
		25.5	0.509509	87.2243		0.6225	6.74164
		26.5	0.488481	87.9899		0.5585	6.65831
		27.5	0.492242			0.578	7.04997
		28.5	0.48994		0.875846	0.619	6.24997
		29.5	0.486416			0.596	6.69164
		30.5	0.498358		0.406052	0.621	6.82081

## Sheet: MUC7
					Solid phase data					Pore water data
	Station	Sed. depth	Porosity	Grain-size D50	BSi	TOC	CaCO3	210Pb	Sed. depth	H4SiO4	Fe	Li	K
		cm		µm	wt%	wt%	wt%	dpm/g	cm	µmol/l	µmol/l	µmol/l	mmol/l
	MUC7	0.5	0.880716	8.47389	3.10893	2.4385	9.63746		0	22.64	0	25.3306	10.4231
		1.5	0.863762	25.7738	1.84075	2.374	8.49997		0.5	115.16	0.0183981	32.2909	10.6005
		2.5	0.867038	20.4081	2.04423	2.385	9.26246		1.5	148.62	-0.00695671	33.6152	10.6781
		3.5	0.864886	7.60696	2.24187	2.3265	10.225		2.5	190.22	0.222592	35.4123	10.6209
		4.5	0.863868	7.7217	2.15081	2.34	9.89579		3.5	204	0.330084	30.9777	10.7157
		5.5	0.857832	7.69916	2.04629	2.283	10.3375		4.5	194.74	0.18928	26.1889	10.6864
		6.5	0.84655	8.27711	2.16345	2.3625	10.525		5.5	186.9	0.176297	26.3895	10.7674
		7.5	0.838949	6.84106	2.98556	2.447	11.2833		7	174.84	0.17535	26.1739	10.6772
		8.5	0.843765	6.79947	2.87455	2.3835	11.7833		9	160.68	0.321169	25.6518	10.6801
		9.5	0.840561	6.86991	2.10854	2.389	11.4166		11	136.56	0.0634191	25.8165	10.7963
		10.5	0.83091	6.97124	2.03596	2.4205	11.7083		13	90.06	16.4215	25.3706	11.0444
		11.5	0.825524	5.75425	2.1739	2.457	11.7416		16	94.28	49.4445	25.2619	11.0513
		12.5	0.813728	22.7626	2.1857	2.361	12.3166		20	131.44	80.014	25.1923	11.0852
		13.5	0.824692	23.7151	2.55777	2.3175	12.0166		24	182.88	86.6398	25.4583	11.1162
		14.5	0.818355	7.51975	2.27271	2.333	11.4833		28	221	59.6095	25.5669	11.0492
		15.5	0.815394	24.5419	1.40982	2.257	11.9333		32	243.2	32.989	25.9469	11.2959
		16.5	0.819522	8.02894	1.5581	2.1915	11.5833		36	257.4	31.1936	26.1812	11.4346
		17.5	0.798618	6.77371	3.06022	2.252	11.2083		40	248.8	30.3477	26.3836	11.4945
		18.5	0.822265	6.55908	3.32772	2.139	11.1541
		19.5	0.825134	6.88573	2.27345	2.058	10.6583
		20.5	0.829432	7.78348	2.69815	1.967	11.0375
		21.5	0.823181	7.69274	2.18291	2.142	11.1875
		22.5	0.817745	7.59754	2.38336	1.9255	11.6625
		23.5	0.817972	7.05312	2.96151	1.9465	12.7291
		24.5	0.819839	7.89617	2.09704	1.948	11.6916
		25.5	0.80982	6.95238	1.19419	1.8845	12
		26.5	0.809087	7.54139	2.2835	1.8915	11.7958
		27.5	0.790739	7.45243	0.868589	1.948	9.87496
		28.5	0.803086	8.11257	1.50221	1.9375	11.8916
		29.5	0.792872	7.14233	1.37072	1.905	13.0166
		30.5	0.733371	7.30036	1.05925	1.908	8.49997
		31.5	0.773442	8.13018	1.43302	1.9325	10.8166
		32.5	0.801705	7.97742	2.86645	1.9945	11.7791
		33.5	0.795496	7.7217	1.9647	1.7705	12.8833
		34.5	0.799137	7.62272	2.10603	1.8615	11.7
		35.5	0.804509	7.53829	1.58433	1.8825	12.2208
		36.5	0.806334	6.89897	1.99139	1.881	12.1625
		37.5	0.812503	7.25086	2.47866	1.849	11.7833
		38.5	0.801556	27.1257	1.88945	1.804	12.2458
		39.5	0.814164	19.3884	2.88691	1.7905	12.1708
		40.5	0.811201	18.4904	2.86281	1.784	12.1666
		41.5	0.803375	21.3869	1.81928	1.763	11.9875
		42.5	0.795191	7.66396	2.34116	1.7585	12.6708
		43.5	0.785307	7.92309	4.67138	1.742	11.7375
		44.5	0.803118		3.6265	1.748	11.8416

## Sheet: MUC8
					Solid phase data					Pore water data
	Station	Sed. depth	Porosity	Grain-size D50	BSi	TOC	CaCO3	210Pb	Sed. depth	H4SiO4	Fe	Li	K
		cm		µm	wt%	wt%	wt%	dpm/g	cm	µmol/l	µmol/l	µmol/l	mmol/l
	MUC8	0.5	0.885702	11.0804	1.51155	2.431	13.3958		0	12.52	0.578393	25.3177	10.415
		1.5	0.860498	11.5408	1.8783	2.443	13.1124		0.5	131.12	0.262933	25.9083	10.6702
		2.5	0.8532	11.4087	1.61117	2.452	13.8333		1.5	177.28	0.370504	25.77	10.6546
		3.5	0.850033	12.3102	2.47014	2.491	13.5583		2.5	178.3	0.761349	25.8794	10.6856
		4.5	0.837432	12.9188	1.52674	2.6005	12.8416		3.5	173.88	0.7559	25.746	10.7055
		5.5	0.829316	10.2299	1.78528	2.444	14.2624		4.5	158.16	1.79084	26.0374	10.726
		6.5	0.8201	9.688	2.91469	2.6375	14.4583		5.5	135.82	0.8006	25.9009	10.7615
		7.5	0.809861	16.3483	2.24409	2.569	14.3291		7	106.28	2.06337	25.8644	10.9361
		8.5	0.793928	18	1.27618	2.6065	14.2583		9	145.24	45.7812	25.6773	10.9374
		9.5	0.777232	18.7848	1.95405	2.509	14.3333		11	232.2	53.2934	25.3608	10.9135
		10.5	0.771355	18.2436	1.65249	2.5095	12.9624		13	308.2	49.0902	25.4479	10.9345
		11.5	0.769984	18.8334	2.44396	2.6215	14.2958		16	377.4	40.5028	25.3267	10.8966
		12.5	0.769729	14.7047	2.27889	2.5465	14.7208		20	440	39.9664	25.1655	10.9061
		13.5	0.76454	17.4706	2.03885	2.5245	14.8708		24	464.4	27.4368	25.6872	11.0859
		14.5	0.762877	15.641	0.79645	2.5045	15.2291		28	491	20.7929	25.1095	10.9509
		15.5	0.765817	14.4914	2.47391	2.5085	15.0624		32	519	13.2625	24.8859	10.935
		16.5	0.762808	14.0356	1.54605	2.529	15.4708		36	540.4	15.2029	25.1077	11.2302
		17.5	0.757867	14.686	1.69934	2.514	15.3666
		18.5	0.756472	12.6416	1.86463	2.5445	15.0041
		19.5	0.752195	12.2121	1.39287	2.5435	14.7041
		20.5	0.757733	11.8256	1.81801	2.5775	14.9916
		21.5	0.757822	11.4965	3.03712	2.605	15.1666
		22.5	0.760691	12.532	2.2243	2.6385	14.7083
		23.5	0.75989	11.3591	1.60753	2.645	13.9416
		24.5	0.752769	12.4597	1.73345	2.589	13.7916
		25.5	0.749028	12.649	2.65846	2.5455	13.8124
		26.5	0.747828	13.9749	1.9945	2.676	12.6749
		27.5	0.751817	11.9187	2.61849	2.5415	13.8874
		28.5	0.752548	12.6637	2.1	2.56	13.2333
		29.5	0.744314	14.283	1.61627	2.4175	14.2874
		30.5	0.754168	10.9802	1.67165	2.447	13.8624
		31.5	0.756284	12.5903	3.03979	2.469	13.8833
		32.5	0.757319	11.0213	2.08956	2.374	13.6041
		33.5	0.754095	12.6196	2.28794	2.4385	14.0499
		34.5	0.75759	14.3099	2.352	2.4895	13.8874
		35.5	0.756766	11.7993	1.56464	2.555	12.9624
		36.5	0.752917	11.6237	2.18373	2.4785	13.7124
		37.5	0.752539	16.93	2.31227	2.455	13.8499
		38.5	0.750368	19.2865	1.95905	2.5055	13.5416
		39.5	0.746133	18.7934	1.82009	2.437	12.9124
		40.5	0.748927		1.77257	2.428	13.1208
		41.5	0.740279		1.96164	2.4075	13.1666

## Sheet: MUC9
					Solid phase data					Pore water data
	Station	Sed. depth	Porosity	Grain-size D50	BSi	TOC	CaCO3	210Pb	Sed. depth	H4SiO4	Fe	Li	K
		cm		µm	wt%	wt%	wt%	dpm/g	cm	µmol/l	µmol/l	µmol/l	mmol/l
	MUC9	0.5	0.900386	8.79047	2.85798	2.273	8.4458		0	20.16	0.079129	25.3731	10.4622
		1.5	0.849782	19.9352		2.169	5.75414	11.34	0.5	97	0.126057	31.3186	10.6908
		2.5	0.83026	8.57723	2.82565	2.229	8.35413		1.5	138.12	0.0769758	32.5683	10.6854
		3.5	0.820907	8.80258		2.0955	9.18746	9.12	2.5	150.9	0.110503	26.5986	10.6853
		4.5	0.83739	18.4855	2.91949	2.413	10.375		3.5	162.88	1.83685	25.8074	10.651
		5.5	0.820855	7.41315		2.379	10.9833		4.5	185.38	0.904487	25.9299	11.0947
		6.5	0.810345	17.0716	3.52877	2.3625	11.4583	10.5	5.5	147.22	0.465827	25.1907	10.8125
		7.5	0.770745	30.1099		2.159	10.4833		7	127.38	0.49157	25.3868	11.0905
		8.5	0.802748	16.93	1.25863	2.3185	11.1916		9	92.9	8.82327	25.0336	10.9463
		9.5	0.806905	5.35737		2.3335	11.075	7.14	11	91.3	35.208	25.4494	11.1341
		10.5	0.781684	7.81303	1.64126	2.334	10.775		13	103.85	42.0383	25.3692	11.2517
		11.5	0.796084	7.72817		2.1845	10.7625		16	139.9	31.9436	25.7562	11.4496
		12.5	0.804712	8.12666	1.80275	2.231	11.9625		20	181.85	18.1574	25.6219	11.5576
		13.5	0.80578	8.02549		2.2435	12.0166	6.42	24	148.85
		14.5	0.805015	24.0097	1.81073	2.2475	11.1625		28	228.9
		15.5	0.802769	8.05318		2.2805	11.05		32	294.9
		16.5	0.802745	7.50436	1.88819	2.1995	10.8708		36	310
		17.5	0.794806	7.75086		2.136	10.9958
		18.5	0.802682	21.9248	2.11856	2.2205	10.625	2.58
		19.5	0.798494	19.5608		2.134	11.175
		20.5	0.79103	9.53797	2.84644	2.134	11.6708
		21.5	0.790461	9.00026		2.127	12.1125
		22.5	0.784318	8.62775	1.21159	2.0995	12.4291
		23.5	0.782053	7.80316		2.125	12.4541	1.14
		24.5	0.770935	8.7184	1.58136	2.044	12.45
		25.5	0.781538	7.56937		2.0725	11.4833
		26.5	0.765755	8.51573	2.21792	1.9035	10.9833
		27.5	0.780799	8.13018		1.9435	12.6791
		28.5	0.780617	7.00924	2.4454	1.948	13.1791	0.18
		29.5	0.782842	8.55793		1.9935	12.0583
		30.5	0.782644	8.60437	2.64371	1.972	13.6041
		31.5	0.782666	8.92526		1.991	13.8791
		32.5	0.751628	8.93354	2.77702	1.8075	13.1124
		33.5	0.783217	8.67879		1.9655	13.8333	0
		34.5	0.782227	8.03585	1.77456	1.935	11.9833
		35.5	0.781678	8.68669		1.933	11.7708
		36.5	0.778749	9.33794	2.03317	1.94	11.9166
		37.5	0.771755			1.913	12.175
		38.5	0.776264		2.81451	1.948	11.875

## Sheet: St.65
					Solid phase data					Pore water data
	Station	Sed. depth	Porosity	Grain-size D50	BSi	TOC	CaCO3	210Pb	Sed. depth	H4SiO4	Fe	Li	K
		cm		µm	wt%	wt%	wt%	dpm/g	cm	µmol/l	µmol/l	µmol/l	mmol/l
	St.65	0.5	0.898132		2.50001	2.3925	14.0541	15.418	0	0
		1.5	0.858239			2.338	11.8708	15.796	1	196.695
		2.5	0.839122		1.79982	2.2915	12.1708		2	158.588
		3.5	0.823188			2.386	11.7625	12.088	3	229.754
		4.5	0.811134		2.46293	2.372	13.0874	11.512	4	255.37
		5.5	0.805217			2.3765	12.7833	13.066	5	258.239
		6.5	0.801312		2.86757	2.3565	12.8749	10.594	6	213.052
		7.5	0.80097			2.377	12.5249	11.962	7	156.845
		8.5	0.798554		1.8048	2.3105	12.6999	8.662	8	273.725
		9.5	0.797255			2.4255	11.175	7.492	9	173.965
		10.5	0.79456		1.82564	2.277	12.425	7.594	10	166.758
		11.5	0.788997			2.204	12.5749	6.094	11	164.016
		12.5	0.782984		1.79132	2.259	13.4541	6.508	12	214.65
		13.5	0.783231			2.237	12.7291		13	186.201
		14.5	0.782657		2.01532	2.251	12.2666	4.786	14	200.072
		15.5	0.784905			2.1725	12.2541	5.194	15	269.458
		16.5	0.78705		1.85358	2.2165	11.8708	3.799	16	264.248
		17.5	0.785327			2.0865	12.1541	3.631	18	357.381
		18.5	0.781973		2.31711	2.1395	11.6166	4.51	20	397.14
		19.5	0.776178			2.076	12.4375	2.155	22	365.387
		20.5	0.772575			2.0885	11.9666	2.7604	26	618.046
		21.5	0.765827		1.86925	1.9245	13.2458	1.4644	28	368.038
		22.5	0.762362			2.0475	11.9375	0.7822	30	515.648
		23.5	0.762342			1.9705	11.4208	0.607	32	543.946
		24.5	0.760232			1.9825	12.6208	1.06	36	314.355
		25.5	0.760631		2.25061	1.947	12.6374	0.364	38	419.379
		26.5	0.754658			1.944	12.7624	0.3616	40	680.329
		27.5	0.760045			1.82155	13.5787	0.2614	42	544.661
		28.5	0.761199			1.959	12.3458	0.421	46	424.934
		29.5	0.763229		2.25491	1.925	12.7749	0.3328	48	452.656
		30.5	0.766008			1.908	12.9458	0.4258	50	616.854
		31.5	0.766315					0.2938
		32.5	0.768475					0.1744
		33.5	0.771576		1.95083			0.2812
		34.5	0.772473					0.0046

## Sheet: BIGO
	Station	Benthic chamber	H4SiO4	Time	Waterheight in the chamber
			mmol/l	h	m
	BIGO2-1	K1-1	0.0118025	0	0.199939
		K1-2	0.0115569	4.91667
		K1-3	0.0146867	9.86667
		K1-4	0.0151832	14.8167
		K1-5		19.7167
		K1-6	0.0196671	24.6667
		K1-7	0.0198826	29.6
		K1-8	0.0207215	34.5333
		K2-1	0.0129698	0	0.20482
		K2-2	0.011435	4.91667
		K2-3	0.0128021	9.86667
		K2-4	0.016057	14.8167
		K2-5	0.0178576	19.7167
		K2-6	0.0161526	24.6667
		K2-7	0.0179231	29.6
		K2-8	0.0173867	34.5333
	BIGO2-2	K1-1	0.0116431	0	0.226512
		K1-2	0.0137518	3.91667
		K1-3	0.0152097	7.86667
		K1-4	0.0173236	11.8
		K1-5		15.7333
		K1-6	0.0167712	19.6667
		K1-7	0.0176951	23.6
		K1-8	0.0209295	27.5333
		K2-1	0.0188853	0	0.198311
		K2-2	0.0206324	3.91667
		K2-3	0.0224426	7.86667
		K2-4	0.0431308	11.8
		K2-5	0.0260041	15.7333
		K2-6	0.0306265	19.6667
		K2-7	0.0273929	23.6
		K2-8	0.0271281	27.5333
	BIGO2-3	K1-1	0.0092084	0	0.200476
		K1-2	0.0126872	3.93333
		K1-3	0.0162511	7.88333
		K1-4	0.0169393	11.8167
		K1-5	0.0164395	15.75
		K1-6	0.017355	19.7
		K1-7	0.0208193	23.6167
		K1-8	0.0215714	27.55
		K2-1	0.00827584	0	0.216488
		K2-2	0.00995872	3.93333
		K2-3	0.0130321	7.88333
		K2-4	0.0131417	11.8167
		K2-5	0.0142754	15.75
		K2-6	0.018258	19.7
		K2-7	0.0181212	23.6167
		K2-8	0.0160705	27.55
